# Supplementary material
Source: PubMed Central journal article supplement (PMC3031420)
Supplement: blood-2010-05-283879_1.pdf [file blood-2010-05-283879_1.pdf]

| <b>Gene</b>          | <b>Accession #</b> | <b>Amplicon</b> | <b>Forward Primer</b> | <b>Reverse Primer</b> |
|----------------------|--------------------|-----------------|-----------------------|-----------------------|
| <i>Hbb-b1/Hbb-b2</i> | NM_008220          | 103 bp          | GTGAGCTCCACTGTGACAAG  | GTGAAATCCTTGCCCAGGTG  |
| <i>Trf</i>           | NM_133977          | 119 bp          | AAAGATGGCGGTGGGGATG   | ACTGGCTTGCGGGTATTGT   |
| <i>Gapdh</i>         | NM_008084          | 108 bp          | TGGTGAAGGTCGGTGTGAAC  | CAATGAAGGGGTCGTTGATGG |
| <i>Actb</i>          | NM_007393          | 157 bp          | GCTTCTTTGCAGCTCCTTCG  | CCCACGATGGAGGGGAATAC  |
| <i>β2m</i>           | NM_009735          | 136 bp          | GTCTTTCTGGTGCTTGTCTCA | GCGGGTGGAAGTGTGTTAC   |
