# Supplementary material
Source: PubMed Central journal article supplement (PMC3031420)
Supplement: blood-2010-05-283879_3.pdf [file blood-2010-05-283879_3.pdf]

| Chr | Start (bp) | End (bp)  | Interval size (bp) | # genes   | Gene names                                                                                                |
|-----|------------|-----------|--------------------|-----------|-----------------------------------------------------------------------------------------------------------|
| 2   | 97053581   | 97056958  | 3377               | 1         | <i>Lrrc4c</i> , leucine rich repeat containing 4C                                                         |
| 2   | 97063632   | 97064699  | 1067               | 0         |                                                                                                           |
| 2   | 97253890   | 97263403  | 9513               | 0         |                                                                                                           |
| 2   | 97284768   | 97289113  | 4345               | 0         |                                                                                                           |
| 2   | 97292050   | 97318005  | 25955              | 0         |                                                                                                           |
| 2   | 97376055   | 97379497  | 3442               | 0         |                                                                                                           |
| 2   | 97415992   | 97416980  | 988                | 0         |                                                                                                           |
| 2   | 99322116   | 99328580  | 6464               | 0         |                                                                                                           |
| 2   | 99765674   | 99773633  | 7959               | 0         |                                                                                                           |
| 2   | 101053163  | 101054733 | 1570               | 0         |                                                                                                           |
| 2   | 101789925  | 101794709 | 4784               | 1         | <i>Ldlrad3</i> , low density lipoprotein receptor class A domain containing 3                             |
| 2   | 105007013  | 105008426 | 1413               | 1         | <i>Wt1</i> , Wilms tumor 1 homolog                                                                        |
| 2   | 105011760  | 105016787 | 5027               | 0         |                                                                                                           |
| 2   | 105081408  | 105088756 | 7348               | 1         | <i>0610012H03Rik</i>                                                                                      |
| 2   | 105901493  | 105902572 | 1079               | 0         |                                                                                                           |
| 2   | 109560369  | 109560435 | 66                 | 1         | <i>Bdnf</i> , brain derived neurotrophic factor                                                           |
| 2   | 110052313  | 110055568 | 3255               | 1         | <i>Gm13936</i> , predicted gene 13936                                                                     |
| 2   | 110401428  | 110434128 | 32700              | 0         |                                                                                                           |
| 2   | 110577828  | 110579798 | 1970               | 2         | <i>Ano3</i> , anoctamin 3; <i>Muc15</i> , mucin 15                                                        |
| 2   | 110633300  | 110633452 | 152                | 0         |                                                                                                           |
| 2   | 115391580  | 115391776 | 196                | 1         | <i>Gm13977</i> , predicted gene                                                                           |
| 2   | 115517604  | 115528880 | 11276              | 1         | <i>BC052040</i>                                                                                           |
| 2   | 115554443  | 115561044 | 6601               | 0         |                                                                                                           |
| 2   | 115611552  | 115643750 | 32198              | 0         |                                                                                                           |
| 2   | 115657758  | 115692841 | 35083              | 1         | <i>Meis2</i> , Meis homeobox 2                                                                            |
| 2   | 115699455  | 115716042 | 16587              | 0         |                                                                                                           |
| 2   | 118235784  | 118241460 | 5676               | 1         | <i>Eif2ak4</i> , eukaryotic translation initiation factor 2 alpha kinase 4                                |
| 2   | 118274254  | 118287672 | 13418              | 0         |                                                                                                           |
| 2   | 118312143  | 118320514 | 8371               | 0         |                                                                                                           |
| 2   | 118455490  | 118488804 | 33314              | 1         | <i>Bub1b</i> , budding uninhibited by benzimidazoles 1 homolog, beta ( <i>S. cerevisiae</i> )             |
| 2   | 118550264  | 118551121 | 857                | 1         | <i>Plcb2</i> , phospholipase C, beta 2                                                                    |
| 2   | 118550264  | 118551121 | 857                | 0         |                                                                                                           |
| 2   | 118687989  | 118688341 | 352                | 1         | <i>Ivd</i> , isovaleryl coenzyme A dehydrogenase                                                          |
| 2   | 119322000  | 119335821 | 13821              | 0         |                                                                                                           |
| 2   | 119876314  | 119887834 | 11520              | 1         | <i>Spnb5</i> , spectrin beta 5                                                                            |
| 2   | 120690160  | 120697759 | 7599               | 2         | <i>AV039307</i> , expressed sequence 7 ; <i>Ubr1</i> , ubiquitin protein ligase E3 component n-recognin 1 |
| 2   | 120750167  | 120760125 | 9958               | 0         |                                                                                                           |
| 2   | 120960308  | 120962173 | 1865               | 1         | <i>Lcmt2</i> , leucine carboxyl methyltransferase 2                                                       |
| 2   | 121389996  | 121392232 | 2236               | 1         | <i>Frdm5</i> , FERM domain containing 5                                                                   |
| 2   | 121552938  | 121555005 | 2067               | 0         |                                                                                                           |
| 2   | 122031722  | 122036194 | 4472               | 1         | <i>4933406J08Rik</i>                                                                                      |
| 2   | 122141210  | 122144780 | 3570               | 1         | <i>Duox1</i> , dual oxidase 1                                                                             |
| 2   | 122185017  | 122185499 | 482                | 1         | <i>Shf</i> , Src homology 2 domain containing F                                                           |
|     |            |           | <b>344850</b>      | <b>23</b> |                                                                                                           |
