# Supplementary material
Source: PubMed Central journal article supplement (PMC3031420)
Supplement: blood-2010-05-283879_4.pdf [file blood-2010-05-283879_4.pdf]

| Chr | Start (bp)       | End (bp)         | Interval size (bp) | # Genes  | Gene names                                                                                                                                                                                              |
|-----|------------------|------------------|--------------------|----------|---------------------------------------------------------------------------------------------------------------------------------------------------------------------------------------------------------|
| 9   | 99929357         | 99968617         | 39260              | 1        | <i>4930519F24Rik</i>                                                                                                                                                                                    |
| 9   | 100042115        | 100080334        | 38219              | 0        |                                                                                                                                                                                                         |
| 9   | 100093419        | 100101057        | 7638               | 0        |                                                                                                                                                                                                         |
| 9   | 100110201        | 100165103        | 54902              | 0        |                                                                                                                                                                                                         |
| 9   | 100205276        | 100207092        | 1816               | 0        |                                                                                                                                                                                                         |
| 9   | 100226456        | 100233976        | 7520               | 0        |                                                                                                                                                                                                         |
| 9   | 100267242        | 100277751        | 10509              | 0        |                                                                                                                                                                                                         |
| 9   | 100283005        | 100311748        | 28743              | 0        |                                                                                                                                                                                                         |
| 9   | 100368041        | 100404523        | 36482              | 2        | <i>Il20rb</i> , interleukin 20 receptor beta; <i>Nck1</i> , non-catalytic region of tyrosine kinase adaptor protein 1                                                                                   |
| 9   | 100464769        | 100473366        | 8597               | 0        |                                                                                                                                                                                                         |
| 9   | 100474695        | 100483979        | 9284               | 0        |                                                                                                                                                                                                         |
| 9   | 100494645        | 100518925        | 24280              | 1        | <i>Stag1</i> , stromal antigen 1                                                                                                                                                                        |
| 9   | 100536488        | 100569823        | 33335              | 0        |                                                                                                                                                                                                         |
| 9   | 100597341        | 100633960        | 36619              | 0        |                                                                                                                                                                                                         |
| 9   | 100698109        | 100704737        | 6628               | 0        |                                                                                                                                                                                                         |
| 9   | 100729541        | 100729580        | 39                 | 0        |                                                                                                                                                                                                         |
| 9   | 100752127        | 100756842        | 4715               | 0        |                                                                                                                                                                                                         |
| 9   | 100776642        | 100776948        | 306                | 0        |                                                                                                                                                                                                         |
| 9   | 100784466        | 100793482        | 9016               | 0        |                                                                                                                                                                                                         |
| 9   | 100816664        | 100831832        | 15168              | 0        |                                                                                                                                                                                                         |
| 9   | 100852753        | 100855736        | 2983               | 0        |                                                                                                                                                                                                         |
| 9   | 100859674        | 100891911        | 32237              | 1        | <i>Pccb</i> , propionyl Coenzyme A carboxylase, beta polypeptide                                                                                                                                        |
| 9   | 100899747        | 100922557        | 22810              | 0        |                                                                                                                                                                                                         |
| 9   | 100925095        | 100932006        | 6911               | 0        |                                                                                                                                                                                                         |
| 9   | <b>102362000</b> | <b>102366896</b> | <b>4896</b>        | <b>0</b> |                                                                                                                                                                                                         |
| 9   | <b>102534878</b> | <b>102547242</b> | <b>12364</b>       | <b>1</b> | <b><i>Anapc13</i>, anaphase promoting complex subunit 13</b>                                                                                                                                            |
| 9   | <b>102559265</b> | <b>102560223</b> | <b>958</b>         | <b>0</b> |                                                                                                                                                                                                         |
| 9   | <b>102698058</b> | <b>102721011</b> | <b>22953</b>       | <b>0</b> |                                                                                                                                                                                                         |
| 9   | <b>102751218</b> | <b>102790044</b> | <b>38826</b>       | <b>1</b> | <b><i>Ryk</i>, receptor-like tyrosine kinase</b>                                                                                                                                                        |
| 9   | <b>102816359</b> | <b>102817037</b> | <b>678</b>         | <b>0</b> |                                                                                                                                                                                                         |
| 9   | <b>103049602</b> | <b>103049797</b> | <b>195</b>         | <b>1</b> | <b><i>Rab6b</i>, RAB6B, member RAS oncogene family</b>                                                                                                                                                  |
| 9   | <b>103062132</b> | <b>103072908</b> | <b>10776</b>       | <b>0</b> |                                                                                                                                                                                                         |
| 9   | <b>103110235</b> | <b>103117573</b> | <b>7338</b>        | <b>1</b> | <b><i>Trf</i></b>                                                                                                                                                                                       |
| 9   | <b>103134181</b> | <b>103141047</b> | <b>6866</b>        | <b>0</b> |                                                                                                                                                                                                         |
| 9   | <b>103527798</b> | <b>103527828</b> | <b>30</b>          | <b>1</b> | <b><i>Tmem108</i>, transmembrane protein 108</b>                                                                                                                                                        |
| 9   | <b>103770050</b> | <b>103770444</b> | <b>394</b>         | <b>0</b> |                                                                                                                                                                                                         |
| 9   | <b>103782862</b> | <b>103817531</b> | <b>34669</b>       | <b>0</b> |                                                                                                                                                                                                         |
| 9   | 107738466        | 107747425        | 8959               | 1        | <i>Rbm6</i> , RNA binding motif protein 6<br><i>4921517D21Rik</i> ; <i>Camkv</i> , CaM kinase-like vesicle-associated; <i>Mst1r</i> , macrophage stimulating 1 receptor (c-met-related tyrosine kinase) |
| 9   | 107816448        | 107851447        | 34999              | 3        |                                                                                                                                                                                                         |
| 9   | 107866598        | 107869177        | 2579               | 1        | <i>Traip</i> , TRAF-interacting protein                                                                                                                                                                 |
| 9   | 108052784        | 108074487        | 21703              | 1        | <i>Bsn</i> , bassoon                                                                                                                                                                                    |
| 9   | 108122798        | 108124448        | 1650               | 1        | <i>Dag1</i> , dystroglycan 1                                                                                                                                                                            |
| 9   | 108512694        | 108514250        | 1556               | 1        | <i>Arih2</i> , ariadne homolog 2 (Drosophila)                                                                                                                                                           |
| 9   | 108515790        | 108539515        | 23725              | 0        |                                                                                                                                                                                                         |
| 9   | 108544235        | 108591755        | 47520              | 2        | <i>Gm10621</i> , predicted gene; <i>Slc25a20</i> , solute carrier family 25 (mitochondrial carnitine/acylcarnitine translocase), member 20                                                              |
| 9   | 108613915        | 108645430        | 31515              | 1        | <i>Prkar2a</i> , protein kinase, cAMP dependent regulatory, type II alpha<br><i>lp6k2</i> , inositol hexaphosphate kinase 2; <i>Nckipsd</i> , NCK interacting protein with SH3 domain                   |
| 9   | 108649041        | 108719137        | 70096              | 2        |                                                                                                                                                                                                         |

|   |           |           |                |           |                                                                                                                               |
|---|-----------|-----------|----------------|-----------|-------------------------------------------------------------------------------------------------------------------------------|
| 9 | 108725346 | 108750944 | 25598          | 1         | <i>Celsr3</i> , cadherin, EGF LAG seven-pass G-type receptor 3 (flamingo homolog, <i>Drosophila</i> )                         |
| 9 | 108760033 | 108827480 | 67447          | 3         | <i>Gm1985</i> , predicted gene; <i>Slc26a6</i> , solute carrier family 26, member 6; <i>Tmem89</i> , transmembrane protein 89 |
| 9 | 108856211 | 108881219 | 25008          | 1         | <i>Col7a1</i> , collagen, type VII, alpha 1                                                                                   |
| 9 | 109139725 | 109284710 | 144985         | 3         | <i>Fbxw14</i> (aka <i>fbxw12</i> ), F-box and WD-40 domain protein 14; <i>Fbxw28</i>                                          |
| 9 | 109285944 | 109315610 | 29666          | 0         | <i>Fbxw22</i>                                                                                                                 |
| 9 | 109357120 | 109384502 | 27382          | 1         | <i>Fbxw19</i> , F-box and WD-40 domain protein 19                                                                             |
| 9 | 109588628 | 109599135 | 10507          | 1         | <i>Fbxw18</i> , F-box and WD-40 domain protein 18                                                                             |
|   |           |           | <b>1153855</b> | <b>33</b> |                                                                                                                               |
