# Supplementary material
Source: PubMed Central journal article supplement (PMC3031420)
Supplement: blood-2010-05-283879_5.pdf [file blood-2010-05-283879_5.pdf]

| Chr | Start (bp) | End (bp)  | Interval size (bp) | # genes   | Gene names                                                                                                                                       |
|-----|------------|-----------|--------------------|-----------|--------------------------------------------------------------------------------------------------------------------------------------------------|
| 7   | 108900660  | 108902045 | 1385               | 1         | <i>Clpb</i> , ClpB caseinolytic peptidase B homolog (E. coli)                                                                                    |
| 7   | 108911471  | 108915587 | 4116               | 0         |                                                                                                                                                  |
| 7   | 109140029  | 109140890 | 861                | 1         | <i>Numa1</i> , nuclear mitotic apparatus protein 1                                                                                               |
| 7   | 109174144  | 109178131 | 3987               | 1         | <i>Rnf121</i> , ring finger protein 121                                                                                                          |
| 7   | 109684348  | 109710167 | 25819              | 2         | <i>Trim21</i> , tripartite motif-containing 21; <i>Olf549</i> , olfactory receptor 549                                                           |
| 7   | 109722083  | 109737409 | 15326              | 2         | <i>Olf550</i> ; <i>Olf551</i>                                                                                                                    |
| 7   | 109742171  | 109760894 | 18723              | 1         | <i>Olf552</i>                                                                                                                                    |
| 7   | 109818044  | 109818563 | 519                | 1         | <i>Olf556</i>                                                                                                                                    |
| 7   | 109834474  | 109849197 | 14723              | 1         | <i>Trim68</i> , tripartite motif-containing 68                                                                                                   |
| 7   | 109941775  | 109954448 | 12673              | 1         | <i>Olf564</i>                                                                                                                                    |
| 7   | 110089386  | 110091793 | 2407               | 0         |                                                                                                                                                  |
| 7   | 110096333  | 110098214 | 1881               | 1         | <i>Olf574</i>                                                                                                                                    |
| 7   | 110825054  | 110895194 | 70140              | 3         | <i>Olf243</i> ; <i>Olf628</i> ; <i>Olf629</i>                                                                                                    |
| 7   | 110915067  | 110917042 | 1975               | 1         | <i>Olf69</i>                                                                                                                                     |
| 7   | 110917244  | 110917641 | 397                | 0         |                                                                                                                                                  |
| 7   | 110937379  | 111034798 | 97419              | 10        | <i>Hbb</i> , hemoglobin cluster; <i>Gm5736</i> , predicted gene; <i>Gm15115</i> ; <i>Gm15118</i> ; <i>Gm15119</i> ; <i>Gm1624</i> ; <i>Olf66</i> |
| 7   | 111043530  | 111053693 | 10163              | 0         |                                                                                                                                                  |
| 7   | 111628159  | 111629110 | 951                | 1         | <i>AI451617</i> , expressed sequence AI451617                                                                                                    |
| 7   | 111632291  | 111647983 | 15692              | 0         |                                                                                                                                                  |
| 7   | 111681954  | 111709126 | 27172              | 2         | <i>Gm6577</i> ; <i>Olf651</i>                                                                                                                    |
| 7   | 111723293  | 111723360 | 67                 | 0         |                                                                                                                                                  |
| 7   | 111746781  | 111763235 | 16454              | 0         |                                                                                                                                                  |
| 7   | 111766905  | 111775559 | 8654               | 1         | <i>Olf656</i>                                                                                                                                    |
| 7   | 113700131  | 113702931 | 2800               | 0         |                                                                                                                                                  |
| 7   | 114072790  | 114077080 | 4290               | 0         |                                                                                                                                                  |
| 7   | 114138047  | 114145354 | 7307               | 1         | <i>Olf2</i>                                                                                                                                      |
| 7   | 114146002  | 114170899 | 24897              | 0         |                                                                                                                                                  |
| 7   | 114206836  | 114212508 | 5672               | 1         | <i>Olf713</i>                                                                                                                                    |
| 7   | 114339223  | 114361659 | 22436              | 3         | <i>Gm3765</i> ; <i>Nlrp14</i> , NLR family, pyrin domain containing 14, <i>Rbmx12</i> , RNA binding motif protein, X-linked-like 2               |
|     |            |           | <b>418906</b>      | <b>35</b> |                                                                                                                                                  |
