# Supplementary material
Source: PubMed Central journal article supplement (PMC3031420)
Supplement: blood-2010-05-283879_6.pdf [file blood-2010-05-283879_6.pdf]

| Chr | Start (bp) | End (bp)  | Interval size (bp) | # genes   | Gene names                                                                                                                                          |
|-----|------------|-----------|--------------------|-----------|-----------------------------------------------------------------------------------------------------------------------------------------------------|
| 6   | 88523618   | 88565064  | 41446              | 1         | <i>Kbtbd12</i> , kelch repeat and BTB (POZ) domain containing 12                                                                                    |
| 6   | 88842265   | 88868562  | 26297              | 2         | <i>Mcm2</i> , minichromosome maintenance deficient 2 mitotin ( <i>S. cerevisiae</i> ); <i>Tpra1</i> , transmembrane protein, adipocyte associated 1 |
| 6   | 88896371   | 88917527  | 21156              | 0         |                                                                                                                                                     |
| 6   | 88984697   | 89017457  | 32760              | 0         |                                                                                                                                                     |
| 6   | 100939759  | 100998910 | 59151              | 1         | <i>Gm5882</i> , predicted gene                                                                                                                      |
| 6   | 103168248  | 103196681 | 28433              | 0         |                                                                                                                                                     |
| 6   | 103240166  | 103248852 | 8686               | 0         |                                                                                                                                                     |
| 6   | 104404542  | 104426199 | 21657              | 0         |                                                                                                                                                     |
| 6   | 104429238  | 104757656 | 328418             | 2         | <i>Cntn6</i> , contactin 6; <i>Gm11117</i>                                                                                                          |
| 6   | 104931531  | 104952103 | 20572              | 0         |                                                                                                                                                     |
| 6   | 105047258  | 105060953 | 13695              | 0         |                                                                                                                                                     |
| 6   | 105226389  | 105259172 | 32783              | 0         |                                                                                                                                                     |
| 6   | 105497741  | 105606088 | 108347             | 1         | <i>Gm4379</i>                                                                                                                                       |
| 6   | 105728038  | 105766744 | 38706              | 2         | <i>Cntn4</i> , contactin 4; <i>Gm4379</i>                                                                                                           |
| 6   | 105962156  | 105997236 | 35080              | 0         |                                                                                                                                                     |
| 6   | 106001983  | 106094992 | 93009              | 0         |                                                                                                                                                     |
| 6   | 106393367  | 106432640 | 39273              | 0         |                                                                                                                                                     |
| 6   | 106477416  | 106509728 | 32312              | 0         |                                                                                                                                                     |
| 6   | 106574744  | 106612160 | 37416              | 0         |                                                                                                                                                     |
| 6   | 106622701  | 106668562 | 45861              | 1         | <i>Il5ra</i> , interleukin 5 receptor, alpha                                                                                                        |
| 6   | 106909400  | 106909578 | 178                | 0         |                                                                                                                                                     |
| 6   | 106943186  | 106971546 | 28360              | 0         |                                                                                                                                                     |
| 6   | 106983886  | 106989040 | 5154               | 0         |                                                                                                                                                     |
| 6   | 107171361  | 107173998 | 2637               | 0         |                                                                                                                                                     |
| 6   | 107306949  | 107317560 | 10611              | 0         |                                                                                                                                                     |
| 6   | 109965473  | 109998143 | 32670              | 0         |                                                                                                                                                     |
| 6   | 110002792  | 110190292 | 187500             | 0         |                                                                                                                                                     |
| 6   | 110232717  | 110375895 | 143178             | 0         |                                                                                                                                                     |
| 6   | 110779012  | 110812419 | 33407              | 1         | <i>Grm7</i> , glutamate receptor, metabotropic 7                                                                                                    |
| 6   | 110849173  | 110867934 | 18761              | 0         |                                                                                                                                                     |
| 6   | 111137457  | 111143738 | 6281               | 0         |                                                                                                                                                     |
| 6   | 111607223  | 111718081 | 110858             | 0         |                                                                                                                                                     |
|     |            |           | <b>1644653</b>     | <b>11</b> |                                                                                                                                                     |
